# Supplementary material for: Co 3 O 4 (111) surfaces in contact with water: molecular dynamics study of the surface chemistry and structure at room temperature
Source: Royal Society of Chemistry journal article supplement (doi:10.1039/d4dt01335b), 2024-01-01
Supplement: d4dt01335b1.pdf [file d4dt01335b1.pdf]

## Co<sub>3</sub>O<sub>4</sub> (111) surfaces in contact with water: Molecular dynamics study of the surface chemistry and structure at room temperature

Tim Kox and Stephane Kenmoe\*

Department of Theoretical Chemistry, University of Duisburg-Essen, Universitatetstrasse 2, D-45141, Essen, Germany, \*stephane.kenmoe@uni-due.de

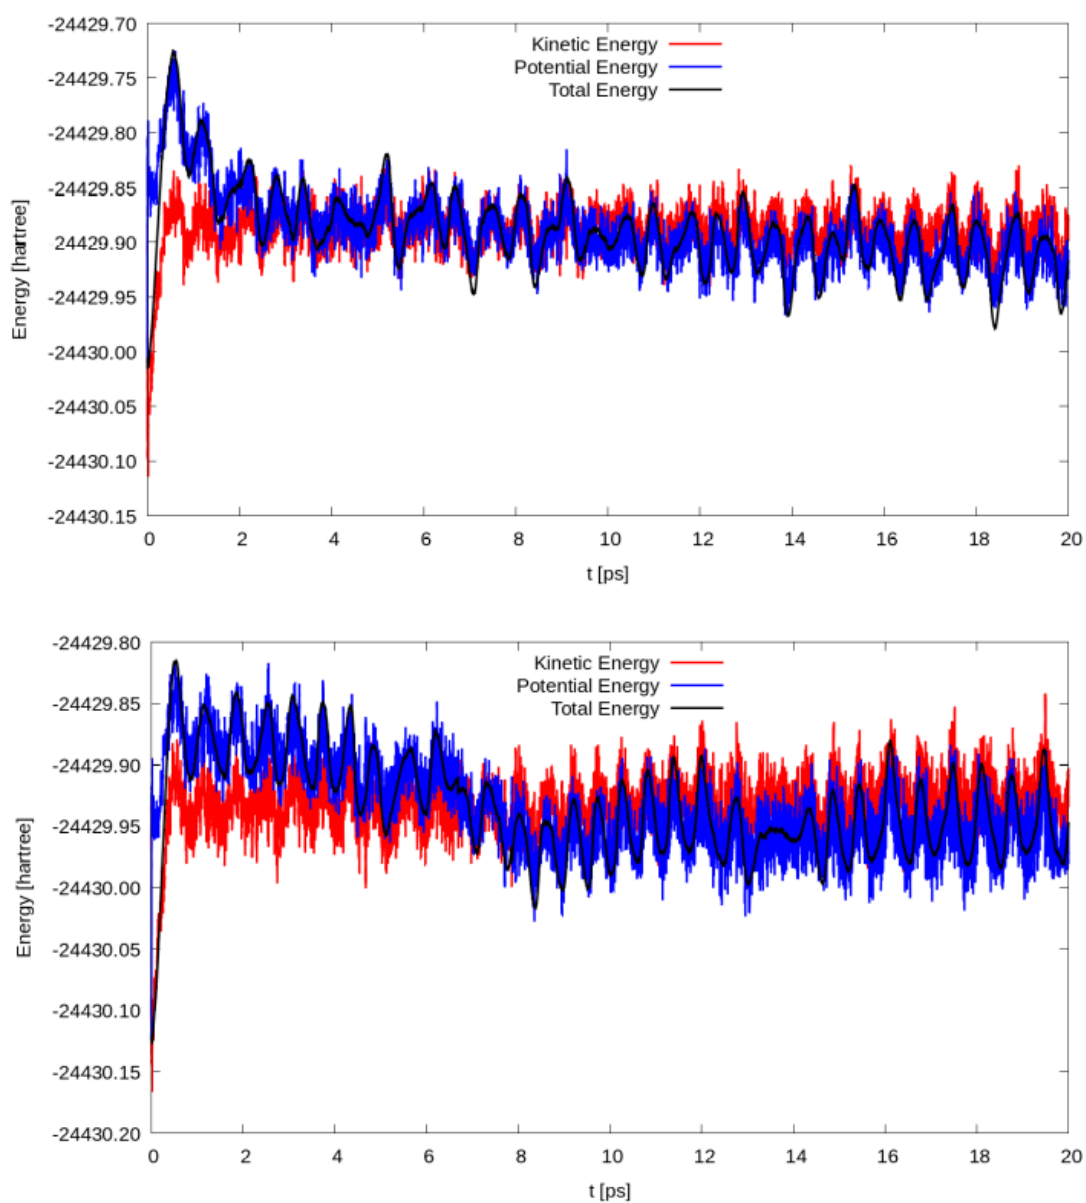

Figure S1: Kinetic, potential and total energies of the water covered A (top) and B- (bottom) terminations during the 20 ps simulations

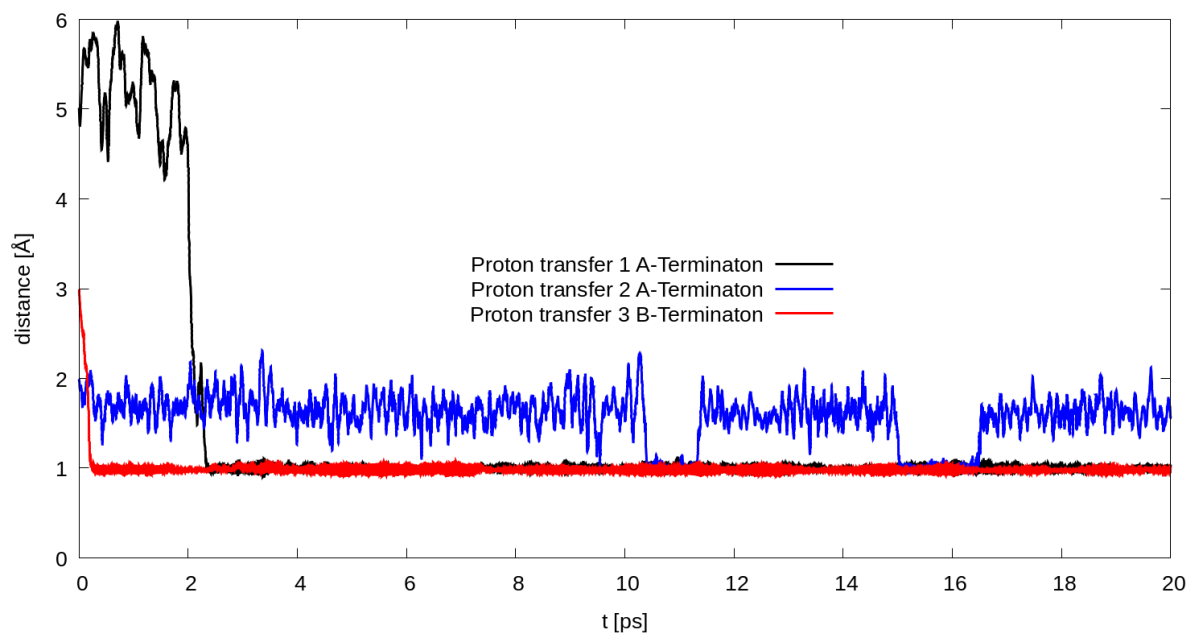

Figure S2: Time evolution of the surface oxygens to water Hydrogens (Os-H) bond distances from the simulations on the A- and B-terminated  $\text{Co}_3\text{O}_4$  (111)/ $\text{H}_2\text{O}$  interface. On the A termination, Proton transfer 1 denotes the transfer happening on the surface oxygens Os1, while Proton transfer 2 denotes the one happening on surface oxygens Os2

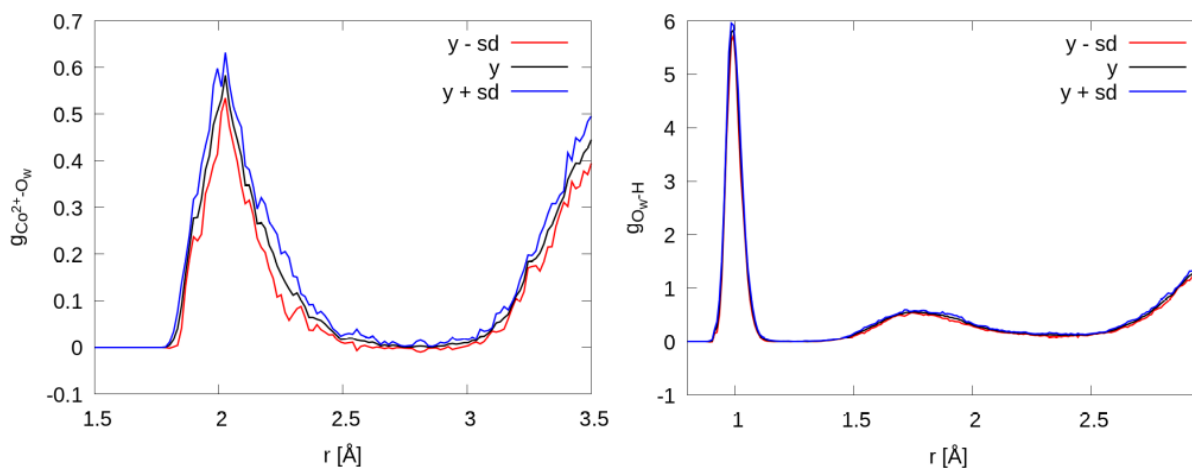

Figure S3: Average value of the radial distribution functions reported together with the standard deviation (sd), of the  $\text{Co}^{2+}$  to water oxygens  $\text{O}_w$  distances (left) and of the water oxygens to water hydrogens distances (right), on the A-terminated surface.

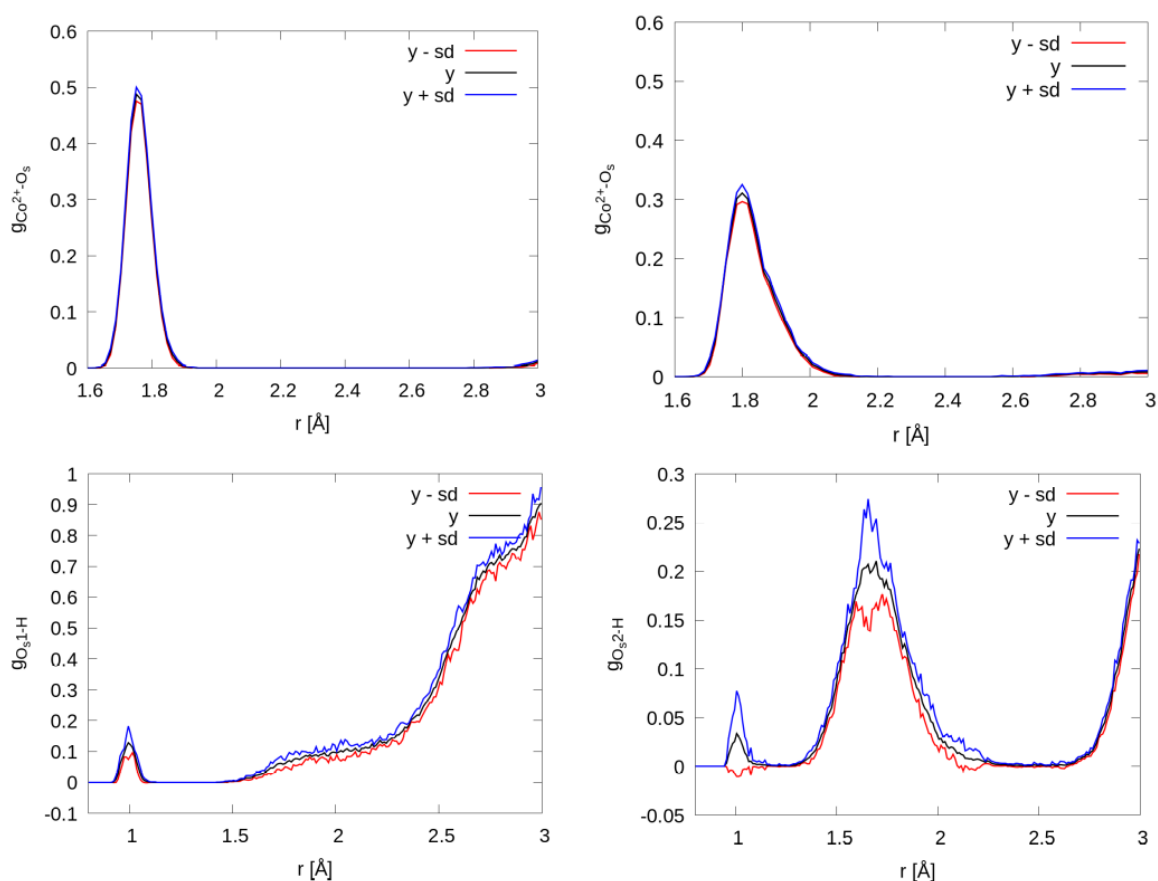

Figure S4: Average value of the radial distribution functions reported together with their standard deviation (sd), of the  $\text{Co}^{2+}$  to surface oxygens  $\text{O}_s$  distances, on the clean (top left) and water covered (top right) on the A-terminated surface. Corresponding values for the surface oxygens to water hydrogens (bottom).

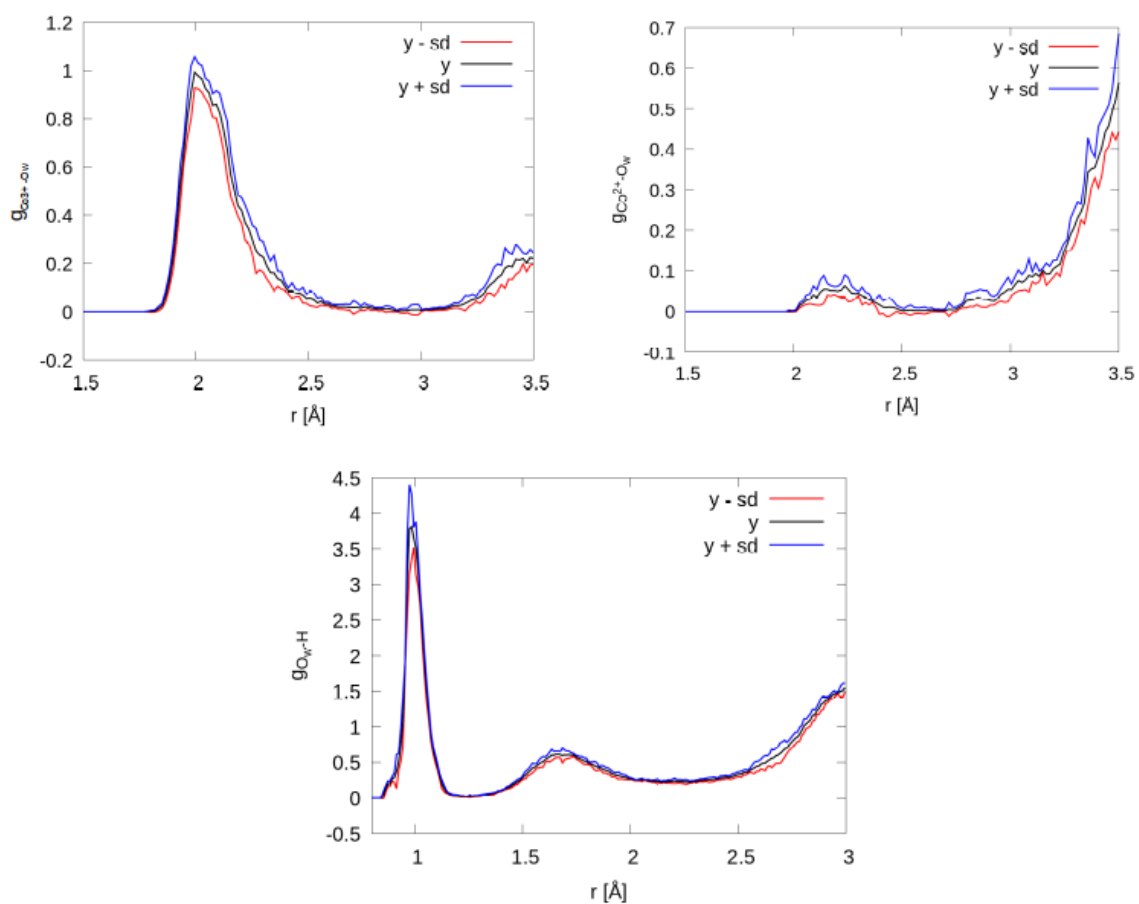

Figure S5: Average value of the radial distribution functions reported together with the standard deviation (sd), of the  $\text{Co}^{3+}$  to water oxygens  $\text{O}_w$  distances (left); of the  $\text{Co}^{2+}$  to water oxygens  $\text{O}_w$  distances (right) and of the water oxygens to water hydrogens distances (bottom), on the B-terminated surface.

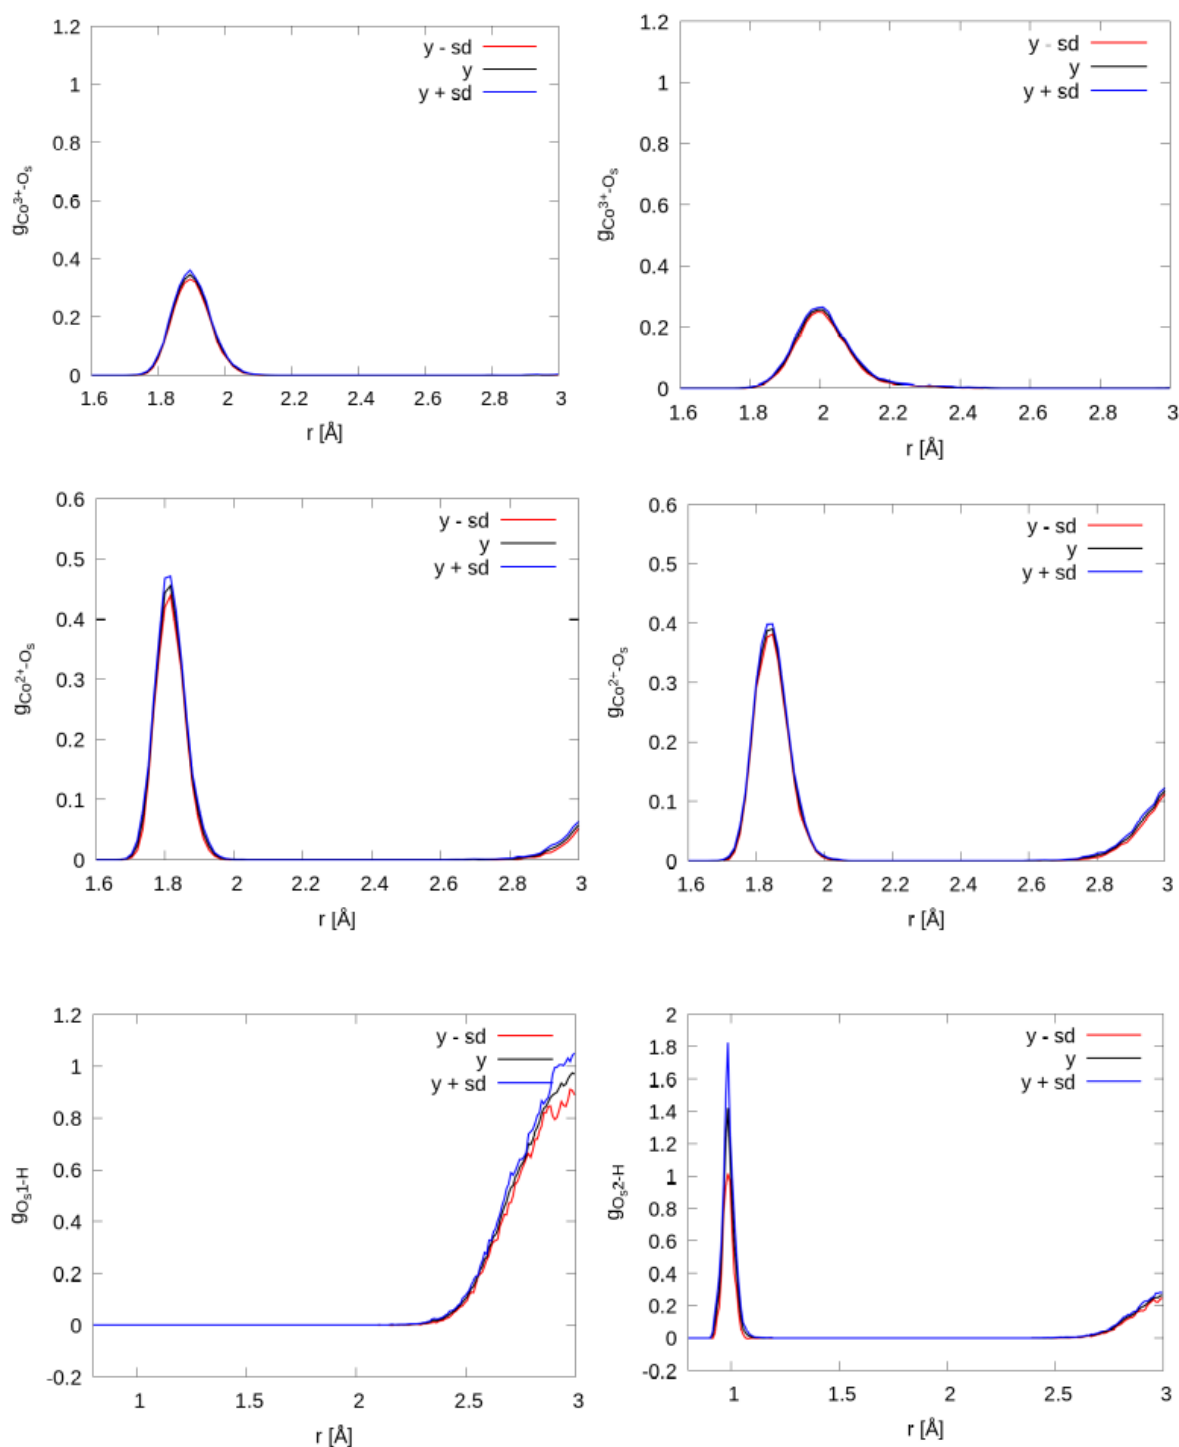

Figure S6: Average value of the radial distribution functions reported together with their standard deviation (sd), of the  $\text{Co}^{3+}$  to surface oxygens  $\text{O}_s$  distances on the clean (top left) and water covered (top right) B-terminated surface; for the  $\text{Co}^{2+}$  to surface oxygens  $\text{O}_s$  distances (middle left and right). Corresponding values for the surface oxygens to water hydrogens (bottom).
